# Predictors of Limb Fat Gain in HIV Positive Patients Following a Change to Tenofovir-Emtricitabine or Abacavir-Lamivudine

Allison Martin<sup>1\*</sup>, Janaki Amin<sup>1</sup>, Sean Emery<sup>1</sup>, David Baker<sup>2</sup>, Andrew Carr<sup>3</sup>, David A. Cooper<sup>1</sup>, Mark Bloch on behalf of the STEAL study group<sup>4</sup>

**1** The Kirby Institute (formerly the National Centre in HIV Epidemiology and Clinical Research), University of New South Wales, Sydney, New South Wales, Australia, **2** East Sydney Doctors, Sydney, New South Wales, Australia, **3** St Vincent's Hospital and St Vincent's Centre for Applied Medical Research, Sydney, New South Wales, Australia, **4** Holdsworth House Medical Practice, Sydney, New South Wales, Australia

## Abstract

**Background:** Antiretroviral treatment (cART) in HIV causes lipoatrophy. We examined predictors of anthropometric outcomes over 96 weeks in HIV-infected, lipoatrophic adults receiving stable cART randomised to tenofovir-emtricitabine (TDF-FTC) or abacavir-lamivudine (ABC-3TC) fixed dose combinations.

**Methodology/Principal Findings:** The STEAL study was a prospective trial of virologically suppressed participants randomised to either TDF-FTC (n = 178) or ABC-3TC (n = 179). Anthropometric assessment was conducted at baseline, weeks 48 and 96. The analysis population included those with baseline and week 96 data remaining on randomised therapy. Distribution of limb fat change was divided into four categories ( $\leq 0\%$ ,  $>0-10\%$ ,  $>10-20\%$ ,  $>20\%$ ). Baseline characteristics [demographics, medical history, metabolic and cardiovascular biomarkers] were assessed as potential predictors of change in percent subcutaneous limb fat using linear regression. 303 participants (85% of STEAL population) were included. Baseline characteristics were: mean ( $\pm$ SD) age 45 ( $\pm 8$ ) years; thymidine analogue nucleoside reverse transcriptase inhibitor (tNRTI) duration 4 ( $\pm 3$ ) years; limb fat 5.4 ( $\pm 3.0$ ) kg; body mass index 24.7 ( $\pm 3.5$ ) kg/m<sup>2</sup>. Mean (SD) limb fat gain to week 48 and 96 was 7.6% ( $\pm 22.4$ ) and 13.2% ( $\pm 27.3$ ), respectively, with no significant difference between groups. 51.5% of all participants had  $>10\%$  gain in limb fat. Predictors of greater limb fat gain at week 96 were baseline tNRTI (10.3, p = 0.001), glucose  $>6$  mmol/L (16.1, p = 0.04), higher interleukin 6 (IL-6) (2.8, p = 0.004) and lower baseline limb fat (3.8–6.4 kg – 11.2;  $>6.4$  kg – 15.7, p trend  $<0.001$ ).

**Conclusions/Significance:** Modest peripheral fat gain occurred with both TDF-FTC and ABC-3TC. Baseline factors associated with more severe lipodystrophy (lipoatrophy, baseline tNRTI, raised IL6, and glucose) predicted greater limb fat recovery at 96 weeks.

**Citation:** Martin A, Amin J, Emery S, Baker D, Carr A, et al. (2011) Predictors of Limb Fat Gain in HIV Positive Patients Following a Change to Tenofovir-Emtricitabine or Abacavir-Lamivudine. PLoS ONE 6(10): e26885. doi:10.1371/journal.pone.0026885

**Editor:** Landon Myer, University of Cape Town, South Africa

**Received:** July 3, 2011; **Accepted:** October 5, 2011; **Published:** October 28, 2011

**Copyright:** © 2011 Martin et al. This is an open-access article distributed under the terms of the Creative Commons Attribution License, which permits unrestricted use, distribution, and reproduction in any medium, provided the original author and source are credited.

**Funding:** The Kirby Institute (formerly the National Centre in HIV Epidemiology and Clinical Research) is funded by the Australian Government Department of Health and Ageing. The views expressed in this publication do not necessarily represent the position of the Australian Government. The Kirby Institute (formerly the National Centre in HIV Epidemiology and Clinical Research) is affiliated with the Faculty of Medicine, University of New South Wales. Funding for the biomarker analysis was provided by Gilead Sciences Pty Ltd. The funders had no role in study design, data collection and analysis, decision to publish, or preparation of the manuscript.

**Competing Interests:** Allison Martin has received some research funding from Gilead Sciences. Janaki Amin declares no conflict of interest. David Cooper received research funding from Boehringer-Ingelheim, Bristol-Myers Squibb, Gilead Sciences, Janssen-Cilag, Merck, and Pfizer; consultancy fees, lecture and travel sponsorships from Abbott, Boehringer-Ingelheim, Bristol-Myers Squibb, Gilead Sciences, GlaxoSmithKline, Janssen-Cilag, Merck, and Pfizer; and has served on advisory boards for Abbott, Boehringer-Ingelheim, Bristol-Myers Squibb, Gilead Sciences, GlaxoSmithKline, Janssen-Cilag, Merck, and Pfizer. Andrew Carr has received research funding from Abbott, Merck and Roche; consultancy fees from Bristol-Myers Squibb, Gilead Sciences, GlaxoSmithKline, Merck and Roche; lecture sponsorships from Abbott, Boehringer-Ingelheim, Bristol-Myers Squibb, Gilead Sciences, GlaxoSmithKline, Merck and Roche; and has served on advisory boards for Abbott, Bristol-Myers Squibb, Gilead Sciences, GlaxoSmithKline, Merck and Roche. Andrew Carr is also on the editorial board of PLoS Medicine. Mark Bloch has received research funding from GlaxoSmithKline, Gilead, Abbott, Merck, Pfizer, Boehringer-Ingelheim and Novartis and travel sponsorships from GlaxoSmithKline, Abbott, Merck, Pfizer and Novartis, and has served on advisory boards for GlaxoSmithKline, Boehringer-Ingelheim, Pfizer, Merck and Janssen-Cilag. David Baker has received research funding from Bristol-Myers Squibb and Merck, consultancy fees from Bristol-Myers Squibb, lecture and travel sponsorships from Abbott, Boehringer Ingelheim, Bristol-Myers Squibb, Gilead, GlaxoSmithKline and Tibotec, and has served on advisory boards for Boehringer-Ingelheim, Bristol-Myers Squibb, Gilead and Tibotec. Sean Emery has either served on advisory boards; received travel grants, consultancy payments or honoraria from Bristol-Myers Squibb, Gilead, Janssen-Cilag, NeuroMolecular Pharmaceuticals, RDI, Roche and Virax. Sean is also an academic editor for PLoS ONE. This does not alter the authors' adherence to all the PLoS ONE policies on sharing data and materials.

\* E-mail: aumphries@kirby.unsw.edu.au

## Introduction

Fat accumulation and depletion (lipoatrophy) are recognised as potential complications of antiretroviral therapy in HIV-infected patients [1,2]. In particular, thymidine analogue nucleoside reverse transcriptase inhibitors (tNRTIs) and protease inhibitors are associated with potentially treatment limiting body fat redistribution manifestations [1–4]. These changes in association with adverse metabolic sequelae and adipose-related inflammation (known as lipodystrophy), may also lead to a higher risk of myocardial infarction [5–7].

In lipodystrophy there is adipocyte damage with an increase in tissue macrophages and production of inflammatory cytokines [8]. The inflammatory changes are also driven by alterations in adipocyte secreting hormones, particularly decreased adiponectin and leptin [9]. The reduced hormonal control results in an up-regulation of cytokines such as tumour necrosis factor (TNF $\alpha$ ) and interleukin 6 (IL-6). With tNRTI-associated lipoatrophy there is depletion of adipocytes, causing reduction of adenosine 5'-triphosphate (ATP) production which affects lipid and glucose metabolism, and eventually leads to apoptosis and reduced fat cell mass [10].

Switching therapy from tNRTIs to non-thymidine based NRTIs such as abacavir (ABC) or tenofovir (TDF) has been shown to gradually reverse lipoatrophy, particularly in the more severe cases [11–16]. Recent studies have examined switching treatment to a fixed dose combination of Kivexa<sup>®</sup> (ABC/lamivudine (3TC)) or Truvada<sup>®</sup> (TDF/emtricitabine (FTC)), and reported these combinations to have similar efficacy [17,18]. The STEAL study demonstrated that changing treatment to either ABC-3TC or TDF-FTC caused a gain in peripheral fat in both treatment groups [18].

The aim of this study was to examine baseline predictors of limb fat gain in the STEAL study population.

## Methods

### Objectives

To examine the predictors of anthropometric outcomes, assessed objectively via dual energy x-ray absorptiometry (DXA), in the STEAL study.

### Participants

Participants in the STEAL body composition sub-study were enrolled from the STEAL study clinical trial. The STEAL study was a 96-week, prospective, controlled trial of participants randomised to simplify existing NRTI drugs to either: tenofovir 300 mg-emtricitabine 200 mg (TDF-FTC)  $n = 178$ ; or abacavir 600 mg-lamivudine 300 mg (ABC-3TC)  $n = 179$ . The primary STEAL study cohort and outcomes have been described [18]. Participants were recruited from 30 clinical sites around Australia.

### Description of Procedures or Investigations undertaken

DXA scans were performed at baseline, week 48 and week 96. Peripheral limb fat was described as absolute mass (kg) and percentage change from baseline to week 48 and 96. The distribution of limb fat mass changes at 96 were categorised as:  $\leq 0\%$ ,  $>0-10\%$ ,  $>10-20\%$  and  $>20\%$ .

The baseline covariates that were analysed were: **Demographics** – age, gender, ethnicity, body mass index (BMI), smoking, blood pressure, concomitant medication; **HIV and antiretroviral therapy markers** – HIV duration, CDC category, CD4+ and CD8+ lymphocyte counts, duration of antiretroviral therapy (cART), use of tNRTI vs non-tNRTI,

non-nucleoside reverse transcriptase inhibitors (NNRTI) vs protease inhibitors (PI), ABC vs TDF, continue on ABC or TDF vs switch from NRTI; **Body composition** – peripheral and trunk fat; **Metabolic markers** – total cholesterol, HDL cholesterol, LDL cholesterol, triglycerides; **Glycaemic markers** – glucose, HOMA (calculated assessment of insulin sensitivity), insulin; **Cardiovascular Biomarkers** – amyloid P, amyloid A, c-reactive protein (hsCRP), d-dimer, fibrinogen, soluble P selectin, vascular cell adhesion protein 1 (VCAM), intercellular adhesion protein 1 (ICAM), cystatin C, interleukin 6 (IL-6) and macrophage migration inhibitory factor (MIF-1). Information on methodology and coefficient of variation details for the assays used has been previously described [19].

### Ethics

The study was approved by each site's Research Ethics Committee (30 sites) and was registered at Clinicaltrials.gov (NCT00192634). Written informed consent was obtained from all participants in the sub-study.

### Statistical methods

The analysis was conducted on a per-protocol population defined by participants that had data from baseline and week 96 DXA scans and who remained on their randomised allocated treatment.

The percent change in limb fat mass was the primary endpoint and was compared by treatment arm (ABC-FTC vs TDF-3TC) using the T-test. Percent change in limb fat mass was also categorised into four groups: limb fat gain of  $\leq 0\%$ ; 0.1–10%; 10.1–20%; and  $>20\%$ . The distribution of participants in these categories according to treatment arm was compared using the Chi squared test.

The association between baseline covariates and percent change in subcutaneous limb fat from baseline to week 96 were analysed using linear regression. Multivariate models were built using forward stepwise methods. Predictors which achieved a  $p$  value  $<0.1$  in univariate analysis were assessed for inclusion in the multivariate model. The final model was checked using backward elimination (data not shown). Baseline predictors were categorised (except for DXA) as previously described in the primary STEAL analysis and cardiovascular biomarker papers [18,19].

Logistic regression was used to examine the relationship between the baseline characteristics and the greatest fat gain ( $>20\%$  category) in the cohort.

### Results

The two randomised arms were well matched (Table 1) in regards to baseline characteristics, except the ABC-3TC treatment arm had a higher proportion of smokers than TDF-3TC (40 vs 29%). The mean baseline percent limb fat mass was 17.2 and 17.3%, ABC-3TC and TDF-FTC, respectively. This equates to an average baseline limb fat mass (SD) across the cohort of 5.4 (3.0) kg. Baseline characteristics for the per protocol population did not differ from those of the intention to treat population (data not shown).

The mean change in peripheral fat over 96 weeks was similar between treatment arms ( $p = 0.775$ ). There was a 14.1% (5.9 kg) and 12.3% (6.0 kg) gain in peripheral fat for the ABC-3TC and TDF-FTC groups, respectively. The participants in both the ABC-3TC and TDF-FTC arms significantly increased limb fat mass over 96 weeks ( $p < 0.001$ ). The observed peripheral fat gain was clinically moderate with patients remaining technically “lipoatrophic”. Mean (SD) percent gain in limb fat mass for the entire

**Table 1.** Baseline characteristics for HIV participants randomised to ABC-3TC or TDF-FTC (n = 357).

| Baseline Characteristic              | ABC-3TC   | TDF-FTC   |
|--------------------------------------|-----------|-----------|
| Age (years)                          | 46±9      | 44±8      |
| Male (%)                             | 98        | 97        |
| Ethnicity - white (%)                | 86        | 86        |
| Body Mass Index (kg/m <sup>2</sup> ) | 24.7±3.5  | 24.8±3.6  |
| HIV duration (years)                 | 10±6      | 10±6      |
| CD4+ count (cells/mm <sup>3</sup> )  | 627±306   | 599±257   |
| Peripheral fat (%)                   | 17.2      | 17.4      |
| Trunk fat (%)                        | 25.7      | 25.6      |
| Current smoker (%)                   | 40        | 29        |
| Prior Abacavir (%)                   | 20        | 21        |
| Prior Tenofovir (%)                  | 30        | 30        |
| Prior Protease Inhibitor (%)         | 24        | 23        |
| hs C-Reactive Protein (mg/L)         | 5.8±21.3  | 3.8±7.4   |
| Interleukin-6 (pg/mL)                | 2.2±2.0   | 1.9±1.4   |
| Amyloid P (ng/mL)                    | 200±144   | 208±152   |
| Amyloid A (ng/mL)                    | 70±109    | 67±106    |
| MIF-1 (pg/mL)**                      | 2901±3109 | 2801±2979 |
| D-Dimer (ngFEU/mL)                   | 259±345   | 217±205   |
| Fibrinogen (g/L)                     | 2.8±0.8   | 2.7±0.7   |
| P-selectin (ng/mL)                   | 118±74    | 119±79    |
| VCAM (ng/mL)***                      | 392±201   | 424±223   |
| ICAM (ng/mL)***                      | 149±83    | 166±98    |
| Cystatin C (mg/L)                    | 0.8±0.1   | 0.8±0.1   |

\*Results are expressed as mean ± SD or %.

\*\*MIF-1 = macrophage migration inhibitory factor 1.

\*\*\*VCAM = vascular cell adhesion molecule; ICAM = intercellular adhesion molecule.

doi:10.1371/journal.pone.0026885.t001

cohort from baseline to week 48 and 96 was 7.4% (22.4) and 13.2% (27.3), respectively (see Figure S1). This is equivalent to an average peripheral fat gain of 224 g at week 48 and 487 g at week 96.

There was no significant difference ( $p=0.493$ ) between the treatment arms when comparing the proportion of percent fat change assessed using the four categories (Table 2). Within the entire cohort 34% of participants had no gain in peripheral limb fat. Fifty-one percent of participants had >10% gain in limb fat

**Table 2.** Percent change in peripheral limb fat mass from baseline to week 96 expressed as quartile categories, based on randomised arm (n = 303).

| Randomised Arm | ≤0%      | >0-10%  | >10-20% | >20%     |
|----------------|----------|---------|---------|----------|
| TDF-FTC (n)*   | 55       | 21      | 28      | 52       |
| ABC-3TC (n)*   | 49       | 22      | 21      | 55       |
| Total n (%)    | 104 (34) | 43 (14) | 49 (16) | 107 (35) |

\*TDF-FTC = tenofovir - emtricitabine; ABC-3TC + abacavir - lamivudine.

\*p value comparing arms over 96 weeks  $p=0.493$ .

doi:10.1371/journal.pone.0026885.t002

mass; ABC-3TC (52%) and TDF-FTC (51%), and 35% had >20% gain; ABC-3TC (37%) and TDF-FTC (33%).

Covariates associated with the percent increase in peripheral fat mass over 96 weeks on univariable analysis are summarised in Table 3. The multivariate linear regression analysis demonstrated that the baseline covariates that were significantly and positively associated with greater limb fat gain were baseline thymidine nucleoside therapy (coefficient 10.3,  $p=0.001$ ), fasting glucose >6 mmol/L (coefficient 16.1,  $p=0.04$ ), higher IL-6 (coefficient 2.8,  $p=0.004$ ) and lower baseline peripheral limb fat (3.8–6.4 kg - coefficient 11.2; >6.4 kg - coefficient 15.7,  $p$  trend<0.001). Baseline use of tenofovir or abacavir did not predict fat gain. The adjusted R squared for this model was 0.15.

The multivariate logistic analysis of the baseline predictors of peripheral fat gain in the participants (35% of cohort) that experienced >20% gain were prior tNRTI use (OR 2.2,  $p=0.001$ ) and lower peripheral fat (OR 0.42,  $p=0.06$ ).

## Discussion

In previous studies various markers have been investigated to predict the development of lipoatrophy [8–10], however very few covariates have been tested as predictors of fat gain associated with reversal of lipoatrophy [11]. This study demonstrated that similar fat mass gains were evident with both TDF-3TC and ABC-FTC in virologically stable, NRTI pre-treated HIV positive patients. At baseline the average limb fat mass across the cohort was 5.4 kg, which corresponds to a mildly lipodystrophic population. More than 50% of participants gained at least 10% peripheral body fat during the 96 week follow-up. In this analysis we identified four covariates that were independent predictors of greater limb fat gain following the switch to either treatment arm: baseline regimen containing a tNRTI, lower peripheral fat, impaired fasting glucose (>6 mmol/L), and higher IL-6. The composite model including these variables explained 15% of the observed changes in body fat over 96 weeks.

Antiretroviral switch studies have previously demonstrated a gain in limb fat after switching from tNRTIs to ABC [11–13]. Martin et al. demonstrated a 2.5 times greater increase in limb fat mass when patients on an tNRTI were switched to ABC (1.26 kg) treatment compared to zidovudine or stavudine (0.49 kg) over 104 weeks [11]. McComsey et al. reported a 22% and 18% increase in arm and leg fat respectively, after switching from stavudine to ABC [12]. Similarly, studies examining switching therapy from tNRTI to TDF have demonstrated increases in total fat mass by 21% [14] and limb fat mass of 0.38 kg [15]. One other study compared switching to either TDF or ABC and reported similar limb fat gain in both treatment arms over 48 weeks, increasing by 0.33 kg (TDF) and 0.48 kg (ABC) [16]. Therefore, the limb fat increase reported in the STEAL study is comparable to previous studies.

Reported predictors for the development of lipoatrophy include increased age, being white race, increased duration of HIV infection, pre-treatment low nadir CD4+ T lymphocyte count and high plasma HIV RNA load, previous AIDS-defining illness, hepatitis C co-infection, use of a tNRTI (particularly stavudine), increased duration of NRTI therapy, adherence to cART, and TNF $\alpha$  polymorphism 238 G/A [3,20–23]. Only one previous study has assessed predictors of the reversal of lipoatrophy and found baseline BMI to be associated with greater fat gain after switching from tNRTIs to ABC [11].

We have found that baseline tNRTI usage and low peripheral limb fat were strongly correlated with greater limb fat gain over 96 weeks. Therefore, those with more severe lipoatrophy, probably

**Table 3.** Baseline covariates assessed in the multivariate model of percent change in peripheral limb fat mass at 96 weeks for HIV participants randomised to ABC-3TC or TDF-FTC (n = 303).

| Baseline Variable                              | Categories                 | Univariate Analysis |             |             |         | Multivariate Analysis |             |             |        |
|------------------------------------------------|----------------------------|---------------------|-------------|-------------|---------|-----------------------|-------------|-------------|--------|
|                                                |                            | Coefficient         | Lower 95%CI | Upper 95%CI | P       | Coefficient           | Lower 95%CI | Upper 95%CI | P      |
| On tNRTI*                                      |                            | 12.4                | 6.3         | 18.5        | <0.0001 | 10.3                  | 4.4         | 16.2        | 0.001  |
| tNRTI duration*                                |                            | 0.1                 | 0.04        | 0.2         | 0.003   | -0.03                 | -0.1        | 0.1         | 0.451  |
| Stratification                                 | Abacavir (reference group) |                     |             |             | 0.016   |                       |             |             | 0.071  |
|                                                | Tenofovir                  | 4.3                 | -4.6        | 13.2        |         | 7.9                   | -0.7        | 16.5        |        |
|                                                | Other                      | 11.0                | 3.0         | 19.1        |         |                       |             |             |        |
| Interleukin-6                                  |                            | 3.3                 | 1.2         | 5.3         | 0.002   | 2.8                   | 0.9         | 4.8         | 0.004  |
| Total Cholesterol (mmol/L)                     | ≤5.5 (reference group)     |                     |             |             | 0.039   |                       |             |             | 0.074  |
|                                                | >5.5                       | -6.7                | -13.1       | 0.4         |         | -5.5                  | -11.6       | 0.5         |        |
| Impaired fasting glucose/<br>diabetes (mmol/L) | ≤6 (reference group)       |                     |             |             | 0.067   |                       |             |             | 0.040  |
|                                                | >6                         | 15.4                | -1.1        | 31.8        |         | 16.1                  | 0.7         | 31.5        |        |
| Peripheral Fat (kg)                            | <3.8 (reference group)     |                     |             |             | <0.001  |                       |             |             | <0.001 |
|                                                | 3.8 to 6.4                 | -10.9               | -18.2       | -3.7        |         | -11.2                 | -18.3       | -4.1        |        |
|                                                | >6.4                       | -17.5               | -24.8       | -10.2       |         | -15.7                 | -22.8       | -8.6        |        |
| Trunk fat (kg)                                 | <7.99 (reference group)    |                     |             |             | 0.010   |                       |             |             | 0.869  |
|                                                | 7.99 to 11.51              | -5.2                | -12.6       | 2.3         |         | -0.3                  | -7.8        | 7.2         |        |
|                                                | >11.51                     | -9.9                | -17.4       | -2.4        |         | -0.8                  | -9.8        | 8.3         |        |

\*tNRTI = thymidine nucleoside reverse transcriptase inhibitors.

doi:10.1371/journal.pone.0026885.t003

caused by tNRTI, were more likely to experience a greater gain in limb fat after switching to ABC or TDF. This could be due to a causal link or could simply be a regression to the mean effect: for example those with less fat at baseline are more likely to gain fat throughout the study; and vice versa those with higher baseline limb fat did not have lipoatrophy and therefore experienced no limb fat gain.

We also found that impaired glucose metabolism (impaired fasting glucose) at baseline predicted greater fat gain. These results suggest there may be an indirect effect of NRTIs on glucose metabolism via the adipose tissue changes caused by NRTIs [24]. However, insulin resistance, as measured indirectly by HOMA or insulin levels did not. Therefore, these results may also be a result of a type-2 error.

Adipose tissue has been shown to produce inflammatory cytokines, such as C-reactive protein and IL-6 [25]. Some studies demonstrated high IL-6 to be correlated with limb fat in HIV patients with lipodystrophy [26,27], whereas others have only demonstrated the same in HIV positive patients compared with controls, not those with lipodystrophy [28]. IL-6 mRNA expression has also been shown to increase in peripheral adipocytes in HIV treated participants with lipodystrophy [8]. The finding in this study that higher IL-6 levels at baseline was associated with greater fat gain over 96 weeks, is consistent with results from these previous studies suggesting that high IL-6 may represent those participants with lipodystrophy at baseline. This finding also reinforces the observation that there are immunological abnormalities that associate with lipodystrophy.

### Limitations

Limitations of this study relate to the inclusion of a HIV population that is not representative of the wider HIV interna-

tional community i.e. participants were predominantly Caucasian men recruited within Australia, with well controlled viraemia. In addition, 20% and 30% of our participants had previously been exposed to abacavir and tenofovir, respectively. Therefore these data cannot be generalised beyond similar populations. Stratification was conducted on previous NRTIs to control for this confounder. There was a low predictive value (15%) of the regression equation suggesting that factors other than those measured may play an important role in changes in peripheral fat. The characteristic with the strongest association with change in peripheral fat was baseline limb fat which may suggest a regression to the mean affect.

This study shows that changing to either ABC or TDF is associated with partial, but probably limited, reversal of lipoatrophy over 96 weeks. The fat gain may be predicted by baseline tNRTI, low peripheral fat, impaired glucose metabolism and high IL-6. These factors associated with predicting limb fat recovery could represent the patients with severe lipodystrophy and the associated inflammatory response. This may also infer a simple regression to the mean effect for patients with more severe lipodystrophy. Further studies into biomarkers should be conducted to assess prediction models of fat gain, most importantly those that are associated with bone and body composition.

### Supporting Information

**Figure S1 Absolute and percentage change from baseline in peripheral limb fat mass to week 48 and 96 for the entire cohort of STEAL participants (ABC-3TC and TDF-FTC) n = 303.** \*p<0.001 of change from baseline to week 96. (TIF)

## Acknowledgments

We extend our grateful thanks to all the participants.

**STEAL study group** – Mark Bloch, David Cooper, Andrew Carr, David Baker, Robert Finlayson, Jennifer Hoy, Tim Read, Nicholas Doong, Norman Roth, Jonathan Anderson, Richard Moore, John Chuah, Alan Street, David Shaw, David Orth, Mark Kelly, David Smith, David Nolan, Mark Boyd, David Gordon, Nicholas Medland, Ban Kiem Tee, Dominic Dwyer, John Dyer, Ian Woolley, Michelle Giles, Stephen Davies, Linda

Dayan, William Donohue, Darren Russell, Jeffrey Post, John Quin, Don Smith, Anthony Allworth

## Author Contributions

Conceived and designed the experiments: AM JA SE DB AC DAC MB. Performed the experiments: AM JA MB. Analyzed the data: AM JA. Wrote the paper: AM JA MB.

## References

- Carr A, Samaras K, Burton S, Law M, Freund J et al (1998) A syndrome of peripheral lipodystrophy, hyperlipidaemia and insulin resistance in patients receiving HIV protease inhibitors. *AIDS* 12: F51–58.
- Carr A, Miller J, Law M, Cooper DA (2000) A syndrome of lipodystrophy, lactic acidemia and liver dysfunction associated with HIV nucleoside analogue therapy: contribution to protease inhibitor-related lipodystrophy syndrome. *AIDS* 14: F25–32.
- Bernasconi E, Boubaker K, Junghans C, Flepp M, Furrer HJ et al (2002) Abnormalities of body fat distribution in HIV-infected persons treated with antiretroviral drugs: The Swiss HIV Cohort Study. *J Acquir Immune Defic Syndr* 31: 50–5.
- Van der Valk M, Gisolf EH, Reiss P, Wit FWNM, Japour A et al (2001) Increased risk of lipodystrophy when nucleoside analogue reverse transcriptase inhibitors are included with protease inhibitors in the treatment of HIV-1 infection. *AIDS* 15: 847–55.
- Friis-Møller N, Weber R, Reiss P, Thiebaut R, Kirk O et al (2003) Cardiovascular disease risk factors in HIV patients - association with antiretroviral therapy. Results from the DAD study. *AIDS* 17: 1179–1193.
- DAD Study Group (2008) Use of nucleoside reverse transcriptase inhibitors and risk of myocardial infarction in HIV-infected patients enrolled in the D:A:D study: a multi-cohort collaboration. *Lancet* 371: 1417–1426.
- The SMART/INSIGHT and D:A:D Study Groups (2008) Use of nucleoside reverse transcriptase inhibitors and risk of myocardial infarction in HIV-infected patients. *AIDS* 22: F17–24.
- Kotler DP, Ionescu G, Johnson JA, Inada Y, He Q et al (2003) Studies of adipose tissue metabolism in human immunodeficiency virus-associated lipodystrophy. *Clin Infect Dis* 37: S47–S51.
- Sweeney L, Brennan A, Mantzoros C (2007) The role of adipokines in relation to HIV lipodystrophy. *AIDS* 21: 895–904.
- Brinkman K, ter Hofstede HJM, Burger DM, Smeitink JAM, Koopmans PP (1998) Adverse effects of reverse transcriptase inhibitors: mitochondrial toxicity as common pathway. *AIDS* 12: 1735–1744.
- Martin A, Smith DE, Carr A, Ringland C, Amin J et al (2004) Reversibility of lipodystrophy in HIV-infected patients 2 years after switching from a thymidine analogue to abacavir: the MITOX Extension Study. *AIDS* 18: 1029–1036.
- McComsey GA, Ward DJ, Heshenthaler SM, Sension MG, Shalit P et al (2004) Improvement in lipodystrophy associated with highly active antiretroviral therapy in human immunodeficiency virus-infected patients switched from stavudine to abacavir or zidovudine: the results of the TARHEEL study. *Clin Infect Dis* 38: 263–270.
- Tebas P, Zhang J, Hafner R, Tashima K, Shevitz A et al (2009) Peripheral and visceral fat changes following a treatment switch to a non-thymidine analogue or a nucleoside-sparing regimen in HIV-infected subjects with peripheral lipodystrophy: results of ACTG A5110. *J Antimicrob Chemo* 63: 998–1005.
- Ribera E, Paradineiro JC, Curran, Sauleda S, Garcia-Arumi E et al (2008) Improvements in subcutaneous fat, lipid profile, and parameters of mitochondrial toxicity in patients with peripheral lipodystrophy when stavudine is switched to tenofovir (LIPOTEST study). *HIV Clin Trials* 9: 407–417.
- Ananworanich J, Nuesch R, Cote HCF, Kerr SJ, Hill A et al (2008) Changes in metabolic toxicity switching from stavudine/didanosine to tenofovir/lamivudine – a Staccato trial sub study. *J Antimicrob Chemo* 61: 1340–1343.
- Moyle GJ, Sabin CA, Carledge J, Johnson M, Wilkins E et al (2006) A randomized comparative trial of tenofovir DF or abacavir as replacement for a thymidine analogue in persons with lipodystrophy. *AIDS* 20: 2043–2050.
- Martinez E, Arranz JA, Podzamecz D, Perez I, Gutierrez F et al. for the BICOMBO study group (2009) A simplification trial switching from nucleoside reverse transcriptase inhibitors to once-daily fixed-dose abacavir/lamivudine or tenofovir/emtricitabine in HIV-1-infected patients with virological suppression. *J Acquir Immune Defic Syndr* 51: 290–297.
- Martin A, Bloch M, Amin J, Baker D, Cooper DA et al. for the STEAL Study Group (2009) Simplification of Antiretroviral Therapy with Tenofovir-Emtricitabine or Abacavir-Lamivudine: A Randomized, 96-Week Trial. *Clin Infect Dis* 49: 1591–1601.
- Martin A, Amin J, Cooper DA, Carr A, Kelleher AD et al (2010) Abacavir does not affect circulating levels of inflammatory or coagulopathic biomarkers in suppressed HIV: a randomized clinical trial. *AIDS* 24: 2657–2663.
- Carr A, Emery S, Law M, Puls R, Lundgren JD et al (2003) An objective case definition of HIV lipodystrophy in HIV-infected adults. *Lancet* 361: 726–735.
- Tien P, Benson C, Zolopa A, Sidney S, Osmond D et al (2006) for the FRAM study investigators. The study of fat redistribution and metabolic change in HIV infection (FRAM): methods, design and sample characteristics. *Am J Epidemiol* 163: 860–869.
- Lichtenstein K, Delaney K, Armon C, Ward DJ, Moorman AC et al (2003) Incidence of and risk factors for lipodystrophy (abnormal fat loss) in ambulatory HIV-1-infected patients. *J Acquir Immune Defic Syndr* 32: 48–56.
- Nolan D, Moore C, Castley A, Sayer D, Mamotte C et al (2003) Tumour necrosis factor- $\alpha$  gene-238 G/A promoter polymorphism associated with a more rapid onset of lipodystrophy. *AIDS* 17: 122–24.
- Grinspoon S, Carr A (2005) Cardiovascular risk and body-fat abnormalities in HIV-infected adults. *N Engl J Med* 352: 48–62.
- Lin Y, Rajala MW, Berger JP, Moller DS, Barzilay N et al (2001) Hyperglycaemia-induced production of acute phase reactants in adipose tissue. *J Biol Chem* 276: 42077–42083.
- Ross AC, Armentrout R, O’Riordan MA, Storer N, Rizk N et al (2008) Endothelial activation markers are linked to HIV status and are independent of antiretroviral therapy and lipodystrophy. *J Acquir Immune Defic Syndr* 49: 499–506.
- Masia P, Padilla S, Garcia N, Jarrin I, Bernai E et al (2010) Endothelial function is impaired in HIV-infected patients with lipodystrophy. *Antivir Ther* 15: 101–110.
- Saumoy M, Lopez-Dupla M, Veloso S, Alonso-Villaverde C, Domingo P et al (2008) The IL-6 system in HIV-1-infection and in HACART-related fat redistribution syndromes. *AIDS* 22: 893–896.
